# Supplementary material for: A MOF-type magnesium benzene-1,3,5-tribenzoate with two-fold interpenetrated ReO3nets
Source: Royal Society of Chemistry journal article supplement (doi:10.1039/b814943g), 2008-12-16
Supplement: b814943g.pdf [file b814943g.pdf]

## **A MOF-type magnesium benzene-1,3,5-tribenzoate with two-fold interpenetrated $\text{ReO}_3$ nets.**

**Christophe Volkringer, Thierry Loiseau,\* Jérôme Marrot and Gérard Férey**

*Institut Lavoisier (UMR CNRS 8180), Université de Versailles Saint Quentin en Yvelines, 45, avenue des Etats-Unis, 78035 Versailles, France. E-mail : loiseau@chimie.uvsq.fr. Phone: +33 1 39 254 373. Fax: +33 1 39 254 358.*

\* To whom correspondence should be addressed.

## **Supplementary materials**

To be submitted to *Chem. Commun. or CrystEngComm*  
Version july 1<sup>st</sup>, 2008  
Revised version august, 25, 2008

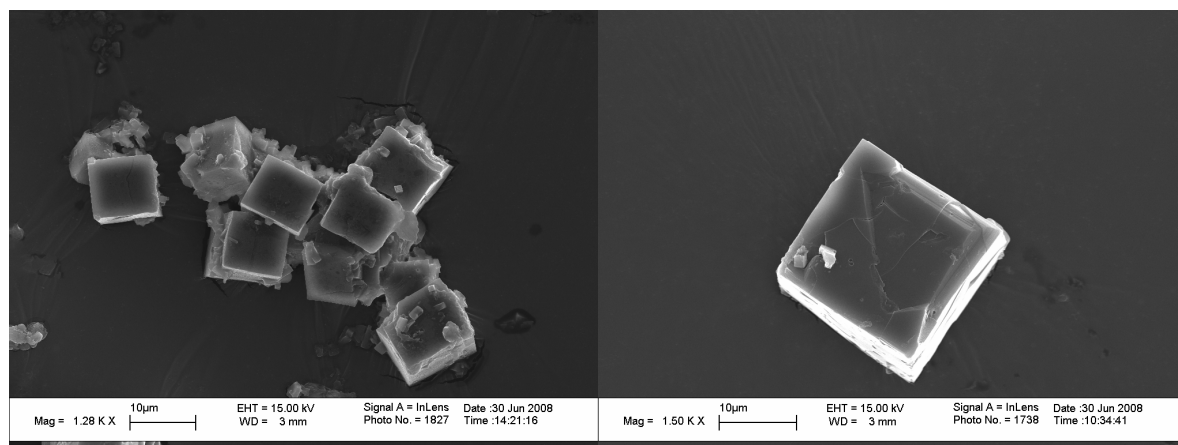

Fig. S1: SEM images of cube-shaped crystals of the magnesium benzene-1,3,5-tribenzoate (MIL-123)

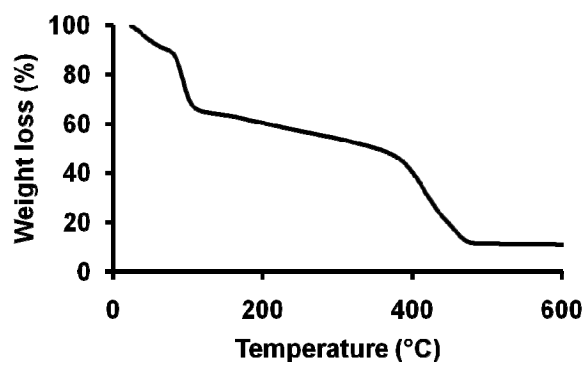

Fig. S2: Thermogravimetric curve of the magnesium benzene-1,3,5-tribenzoate (MIL-123) under O<sub>2</sub> (1°C/min).

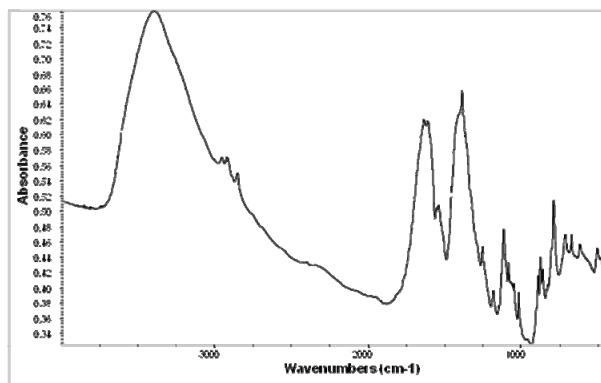

Fig. S3: IR spectrum of the magnesium benzene-1,3,5-tribenzoate (MIL-123)

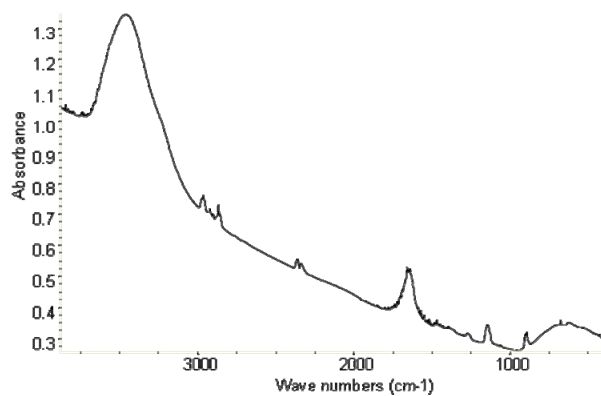

Fig. S3bis: IR spectrum of 1,4-dioxane in KBr collected Room temperature, showing the C-O vibration at 1640 cm<sup>-1</sup>

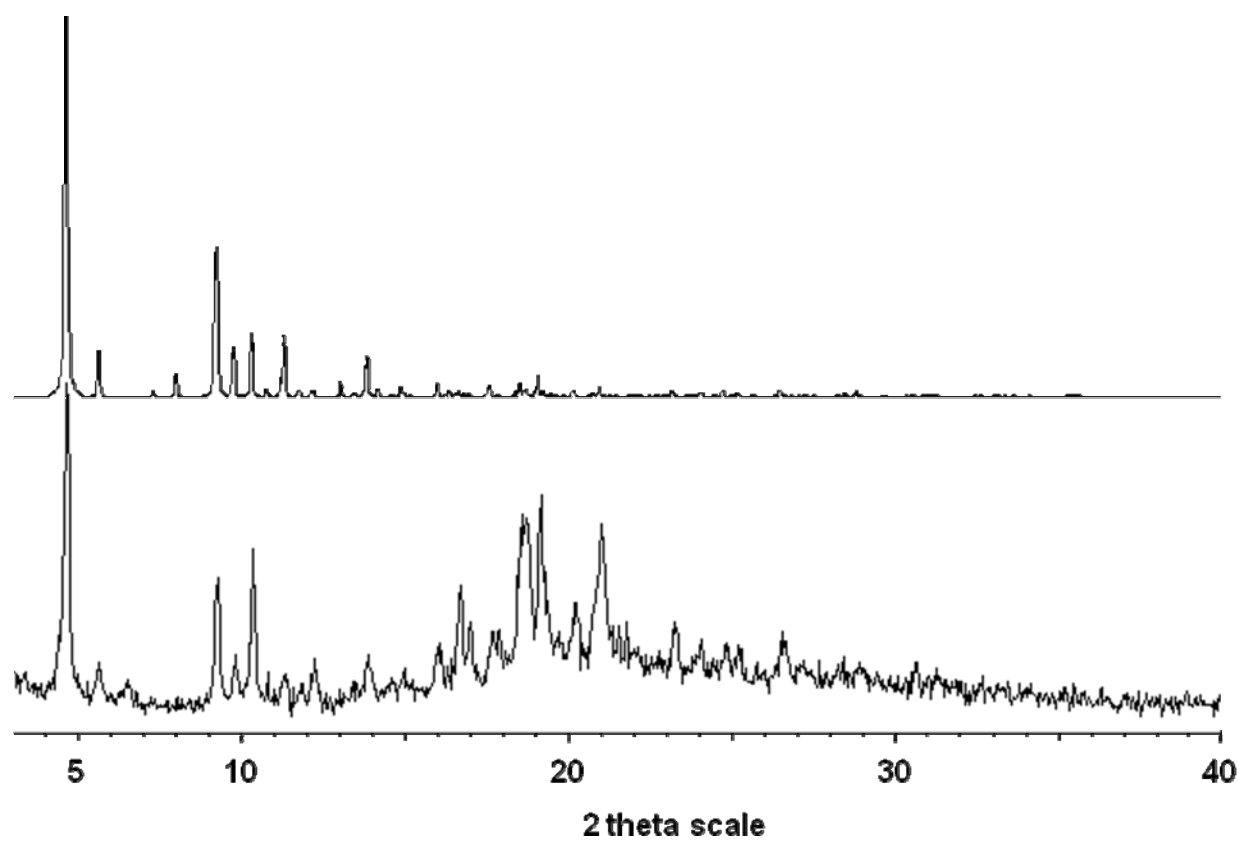

Fig. S4: XRD patterns of MIL-123 (top): calculated; (bottom): as-synthesized
